# Supplementary material for: Sildenafil, a cyclic GMP phosphodiesterase inhibitor, induces microglial modulation after focal ischemia in the neonatal mouse brain
Source: PubMed Central journal article supplement (PMC4850658; doi:10.1186/s12974-016-0560-4), 2016-04-28
Supplement: 12974_2016_560_MOESM1_ESM.pdf [file 12974_2016_560_MOESM1_ESM.pdf]

Supplemental content – Moretti et al.

**Sildenafil, a cyclic GMP phosphodiesterase inhibitor, induces microglial modulation after focal ischemia in the neonatal mouse brain**

**Supplemental results and Figures**

The experiments done in this study were performed in two sets, one with an end-point at 72 hours and the second with an endpoint at 8 days after pMCAo.

Supplemental Figure 1

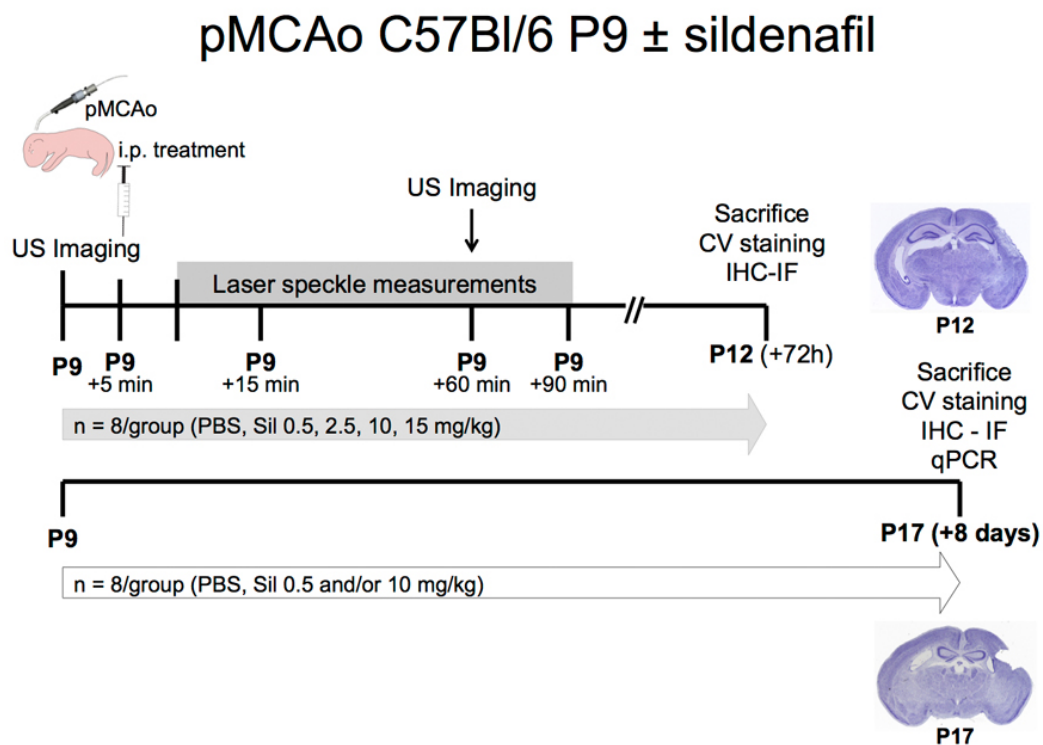

Figure 1: Outline of the experimental procedure in P9 C57Bl/6 mice subjected to pMCAo. CV= cresyl violet, IHC = immunohistochemistry, IF = immunofluorescence. Note that a cavity is observed 8 days after pMCAo (corresponding to the core of the lesion).

Supplemental Figure 2

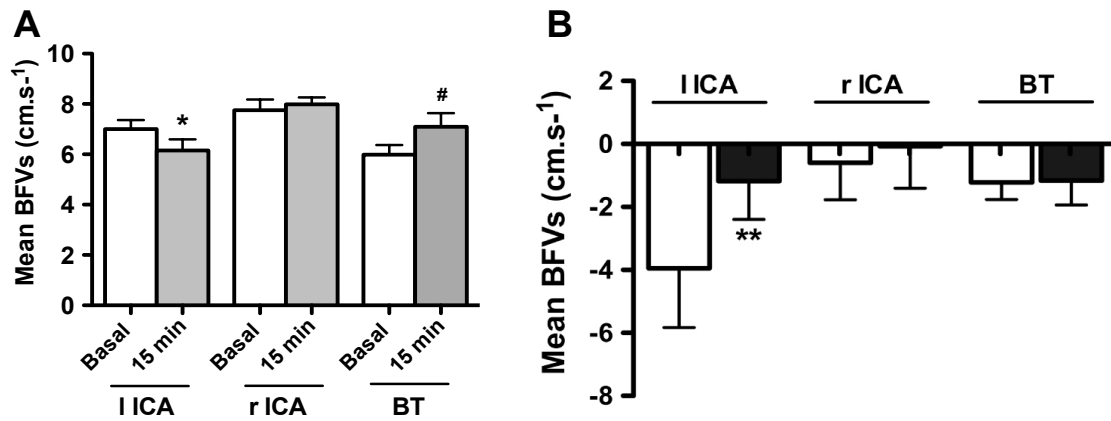

Figure 2: **A**: Mean blood-flow velocities (BFVs) in the left and right ICA (lICA, rICA) and basilar trunk (BT) in basal conditions and 15 min after pMCAo. \*<sup>#</sup> $p < 0.05$  vs Basal for each artery. **B**: Variation in arterial blood flow (BF) in P9 mice subjected to pMCAo, and administered with PBS (white bars) and/or sildenafil (15 mg/kg, black bars). Note that sildenafil, at this dose, reduced low BF in the left ICA (lICA). However, P9 mice have significant increased heart rates compared to PBS (from  $429 \pm 30$  to  $477 \pm 44$  bpm,  $p < 0.05$ ). This increased cardiac function is suggested to be deleterious because of the increasing number of died animals ( $n=3$ ).

Supplemental Figure 3

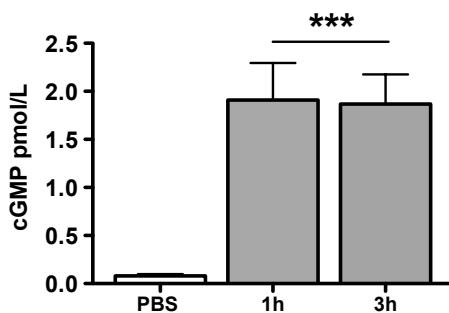

Figure 3: cGMP dosage in the ipsilateral hemisphere in control (PBS-treated naive mice,  $n=5$ ), and in sildenafil- (10 mg/kg) treated mice, at 1 and 3 hours (h) after treatment. \*\*\* $p < 0.001$  vs PBS.

Supplemental Figure 4

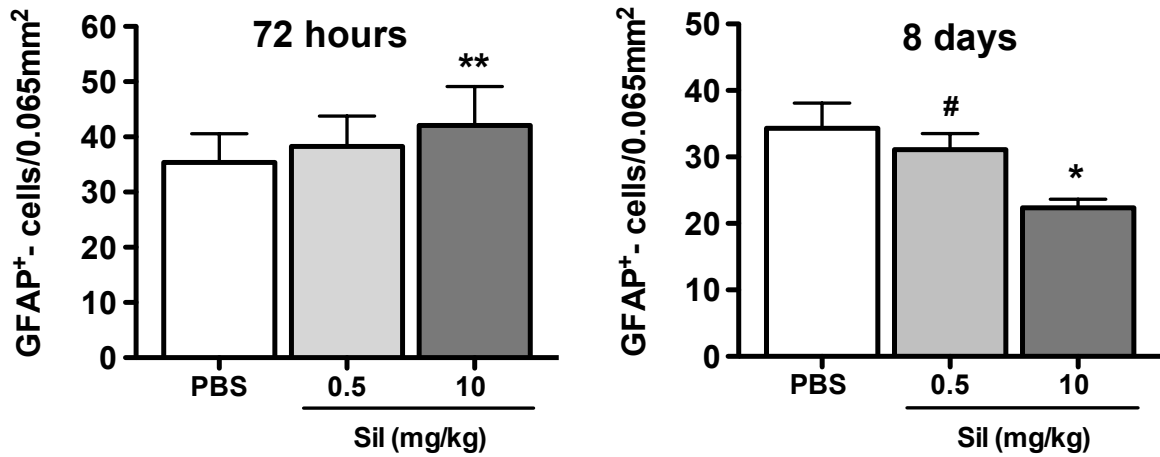

Figure 4: Quantification of GFAP-positive cells in the penumbra at 72 hours and 8 days after pMACo in PBS- and Sildenafil-treated animals (n=8 per group). \* $p < 0.05$ , \*\* $p < 0.001$  vs PBS. # $p < 0.05$  sildenafil 0.5 vs sildenafil 10.

Supplemental Figure 5

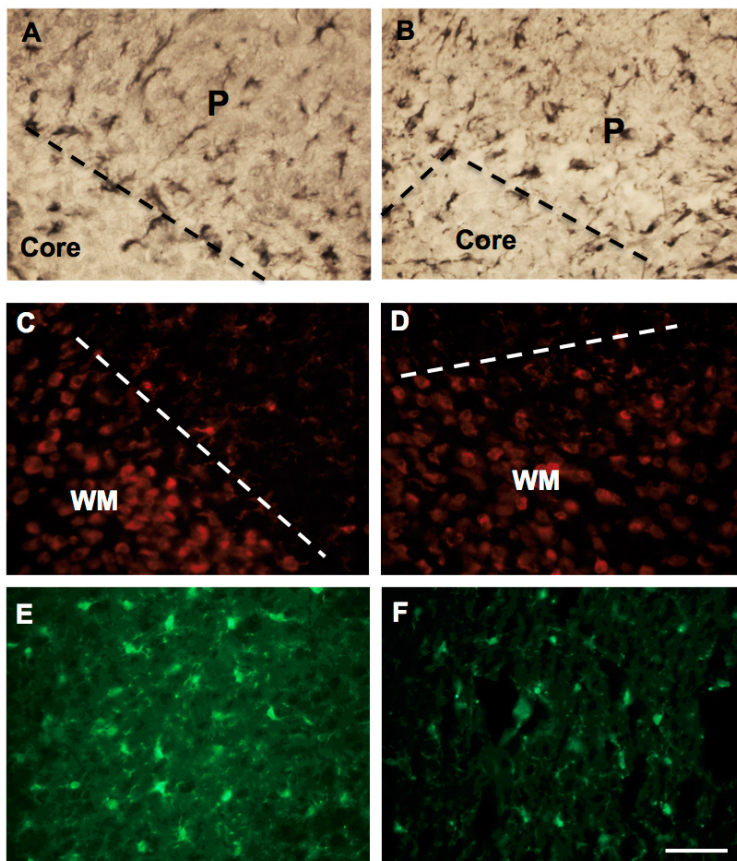

Figure 5: Immunohistochemistry for astrocyte (GFAP, A-B) and macrophage (tomato lectin, TL – C-D)/microglia (Iba-1, E-F) in PBS-treated animals (A, C, and E) and sildenafil 10 mg/kg

(B, D, and F) at 72 hours (A-D), and 8 days (E-F) after pMCAo in mouse pups. Scale bar represents 100  $\mu$ m. P= penumbra; WM= white matter.

Supplemental Figure 6

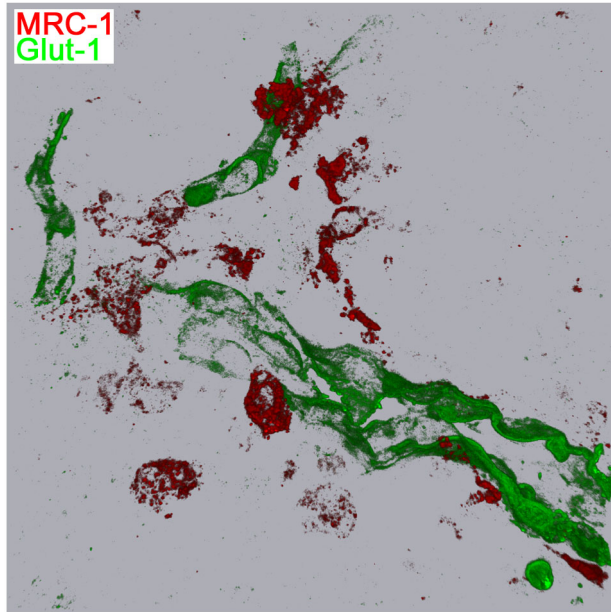

Figure 6: 3D confocal reconstruction of a microvessel stained with the 54 kDa Glut-1 protein (green) and microglia/macrophage stained with MRC-1 protein (M2-like marker).
