# Supplementary material for: Sildenafil, a cyclic GMP phosphodiesterase inhibitor, induces microglial modulation after focal ischemia in the neonatal mouse brain
Source: PubMed Central journal article supplement (PMC4850658; doi:10.1186/s12974-016-0560-4), 2016-04-28
Supplement: 12974_2016_560_MOESM2_ESM.pdf [file 12974_2016_560_MOESM2_ESM.pdf]

**Supplementary Table 1: Primer sequences, protein targets and NCBI references**

| <b>Gene</b>   | <b>Target protein and abbreviation</b>         | <b>Sense</b>                | <b>Anti-sense</b>           | <b>NCBI Reference</b> |
|---------------|------------------------------------------------|-----------------------------|-----------------------------|-----------------------|
| <i>GAPDH</i>  | Glyceraldehyde 3 phosphate dehydrogenase       | GGC CTT CCG TGT TCC TAC     | TGT CAT CAT ATC TGG CAG GTT | NM_008084.2           |
| <i>CD32</i>   | Cluster of differentiation 32 (CD32)           | CTG GAA GAA GCT GCC AAA AC  | CCA ATG CCA AGG GAG ACT AA  | NM_010187.2           |
| <i>CD86</i>   | Cluster of differentiation 86 (CD86)           | GAG CGG GAT AGT AAC GCT GA  | GGC TCT CAC TGC CTT CAC TC  | NM_019388.3           |
| <i>Ptgs2</i>  | Cyclooxygenase-2 (Cox-2)                       | TCA TTC ACC AGA CAG ATT GCT | AAG CGT TTG CGG TAC TCA TT  | NM_011198.3           |
| <i>CD206</i>  | Cluster of differentiation 206 (CD206)         | CTT CGG GCC TTT GGA ATA AT  | TAG AAG AGC CCT TGG GTT GA  | NM_008625.2           |
| <i>Arg1</i>   | Arginase-1 (Arg1)                              | GTG AAG AAC CCA CGG TCT GT  | GCC AGA GAT GCT TCC AAC TG  | NM_007482.3           |
| <i>Lgals3</i> | Galectin-3 (Gal-3)                             | GAT CAC AAT CAT GGG CAC AG  | ATT GAA GCG GGG GTT AAA GT  | NM_010705.3           |
| <i>Il1rn</i>  | Interleukin 1 receptor antagonist (IL-1Rn)     | TTG TGC CAA GTC TGG AGA TG  | TTC TCA GAG CGG ATG AAG GT  | NM_031167.5           |
| <i>Il4ra</i>  | Interleukin 4 receptor alpha (IL-4R $\alpha$ ) | GGA TAA GCA GAC CCG AAG C   | ACT CTG GAG AGA CTT GGT TGG | NM_001008700.3        |
